# Supplementary material
Source: PubMed Central journal article supplement (PMC3811393)
Supplement: AEM.02251-13_zam999104719so1.pdf [file AEM.02251-13_zam999104719so1.pdf]

Table S1. Physicochemical properties of the water samples

| Samples | Weather temperature (°C) <sup>a</sup> | Water temperature (°C) <sup>b</sup> | pH   | Salinity (%) <sup>c</sup> | NaCl (%) <sup>d</sup> | Organic matter (mg l <sup>-1</sup> ) |
|---------|---------------------------------------|-------------------------------------|------|---------------------------|-----------------------|--------------------------------------|
| JAC     | 30°C                                  | 30°C                                | 8.20 | 0.2                       | 0.14                  | 65                                   |
| MAS     | 30°C                                  | 24°C                                | 8.00 | 4.0                       | 1.1                   | 27                                   |
| VER     | 30°C                                  | 28°C                                | 8.05 | 5.0                       | 1.5                   | 54                                   |

JAC, MAS and VER represent Jacarepiá lagoon, Massambaba beach and Vermelha lagoon, respectively.

<sup>a</sup> The weather temperature was measured during the sampling. The weather temperature in this area varies annually from 19 to 32°C.

In summer, the temperature is usually around 26°C.

<sup>b</sup> The water temperature was measured during the sampling.

<sup>c</sup> Total salinity was determined by the density method. This area shows an annual negative water balance, with an excess of evaporation over precipitation. Precipitation exceeds evaporation only in summer. In Vermelha lagoon, the salinity can vary annually from 3.5 to 8%.

<sup>d</sup> The amount of NaCl in water was determined by titration.

Table S2. Identification of the bacterial isolates

| Strains      | Closest BLAST match                | % Similarity | GenBank accession n° | Able to grow using: |
|--------------|------------------------------------|--------------|----------------------|---------------------|
| JNB6_JN      | <i>Pseudomonas aeruginosa</i>      | 100%         | KC137277.1           | naphthalene         |
| JNB2_JN      | <i>Cobetia marina</i>              | 100%         | JX867732.1           | naphthalene         |
| C08-88_JH    | <i>Achromobacter spanius</i>       | 99%          | JN629044.1           | heptadecane         |
| D04-36_JH    |                                    |              |                      |                     |
| B03-67_JH    | <i>Achromobacter xylosoxidans</i>  | 99%          | JQ923444.1           | heptadecane         |
| D06-95_JO    | <i>Acinetobacter calcoaceticus</i> | 100%         | JX010982.1           | crude oil           |
| D05-92_JO    | <i>Pseudomonas aeruginosa</i>      | 100%         | JX469434.1           | crude oil           |
| D08-98_JO    | <i>Achromobacter</i> sp.           | 100%         | JQ901430.1           | crude oil           |
| E01-107_JO   | <i>Pseudomonas</i> sp.             | 99%          | JQ433932.1           | crude oil           |
| E05-10_JO    |                                    |              |                      |                     |
| D12-106_JO   | <i>Acinetobacter</i> sp.           | 100%         | HQ289880.1           | crude oil           |
| F06-20_JO    | <i>Pseudomonas aeruginosa</i>      | 100%         | JX469434.1           | crude oil           |
| F05-19B_JO   | <i>Achromobacter</i> sp.           | 98%          | JQ901430.1           | crude oil           |
| E06-11B_JO   | <i>Achromobacter</i> sp.           | 99%          | JQ901430.1           | crude oil           |
| F03-18_JO    | <i>Acinetobacter</i> sp.           | 100%         | JX843792.1           | crude oil           |
| F02-115/1_JO | <i>Acinetobacter</i> sp.           | 99%          | JN228299.1           | crude oil           |
| E12-16_JO    |                                    |              |                      |                     |
| E11-15_JO    | <i>Pseudomonas aeruginosa</i>      | 100%         | JX424425.1           | crude oil           |
| E10-14_JO    |                                    |              |                      |                     |
| E09-13_JO    |                                    |              |                      |                     |
| E08-12_JO    | <i>Pseudomonas aeruginosa</i>      | 100%         | JX469434.1           | crude oil           |
| E07-11C_JO   | <i>Acinetobacter</i> sp. 19B       | 100%         | HQ289880.1           |                     |
| MNB5a_MN     | <i>Halomonas</i> sp. 5CpOI8        | 99%          | JN602239.1           | naphthalene         |

|              |                                           |      |             |             |
|--------------|-------------------------------------------|------|-------------|-------------|
| MNB3_MN      | <i>Halomonas cupida</i>                   | 100% | AB681327.1  | naphthalene |
| MNB2_MN      | <i>Cobetia marina</i>                     | 100% | JX867732.1  | naphthalene |
| MNB1MN       |                                           |      |             |             |
| MHM5a_MH     | <i>Muricauda aquimarina</i>               | 100% | NR_042909.1 | -           |
| MHM1_MH      | <i>Achromobacter xylosoxidans</i>         | 97%  | JQ923444.1  | heptadecane |
| H08-56_MH    | <i>Achromobacter spanius</i>              | 99%  | JN629044.1  | -           |
| MHM3b_MH     | <i>Marinobacter</i> sp.                   | 99%  | JX119043.1  | heptadecane |
| A01_51_MH    |                                           |      |             |             |
| H07-53_MH    | <i>Marinobacter hydrocarbonoclasticus</i> | 100% | JQ799097.1  | heptadecane |
| MHM11_MH     | <i>Alcanivorax dieselolei</i>             | 99%  | GU370129.1  | heptadecane |
| H03-39_MO    | <i>Achromobacter xylosoxidans</i>         | 99%  | JQ337947.1  | crude oil   |
| MOM4_MO      | <i>Alcanivorax dieselolei</i>             | 99%  | GU370129.1  | crude oil   |
| A09-115/2_MO |                                           |      |             |             |
| A10-116_MO   |                                           |      |             |             |
| A06-42_MO    | <i>Alcanivorax</i> sp.                    | 99%  | HE601937.2  | crude oil   |
| A07-43_MO    |                                           |      |             |             |
| MOM3/2_MO    | <i>Muricauda aquimarina</i>               | 99%  | NR_042909.1 | crude oil   |
| MOM6/2_MO    | <i>Marinobacter hydrocarbonoclasticus</i> | 100% | JQ799097.1  | crude oil   |
| MOM7/2_MO    | <i>Marinobacter</i> sp.                   | 99%  | JX515656.1  | crude oil   |
| MOM16_MO     |                                           |      |             |             |
| MOM10_MO     | <i>Pseudomonas stutzeri</i>               | 99%  | JX177707.1  | ND          |
| VHB3a_VH     | <i>Marinobacter hydrocarbonoclasticus</i> | 100% | JQ799097.1  | heptadecane |
| F09-148A_VO  | <i>Marinobacter</i> sp.                   | 99%  | GQ200194.3  | crude oil   |
| G01-155_VO   | <i>Vitellibacter vladivostokensis</i>     | 100% | AB681115.1  | crude oil   |
| G02-156_VO   | <i>Alcanivorax dieselolei</i>             | 99%  | GU370129.1  | crude oil   |
| H02-159_VO   | <i>Marinobacter</i> sp.                   | 98%  | JX119043.1  | crude oil   |

G06-163\_VO     *Alcanivorax dieselolei*     99%     CP003466.1     crude oil

---

The strains are denoted as follows: the strain code followed by an underline symbol ( ) and a code representing the microcosm from where the strains were isolated from: the first letter corresponds to the origin of each sample (J – Jacarepiá lagoon, M – Massambaba beach and V – Vermelha lagoon), followed by the hydrocarbon used in the different microcosms (H – Heptadecane, N – Naphthalene and O – crude oil).

- no growth observed; ND – not determined

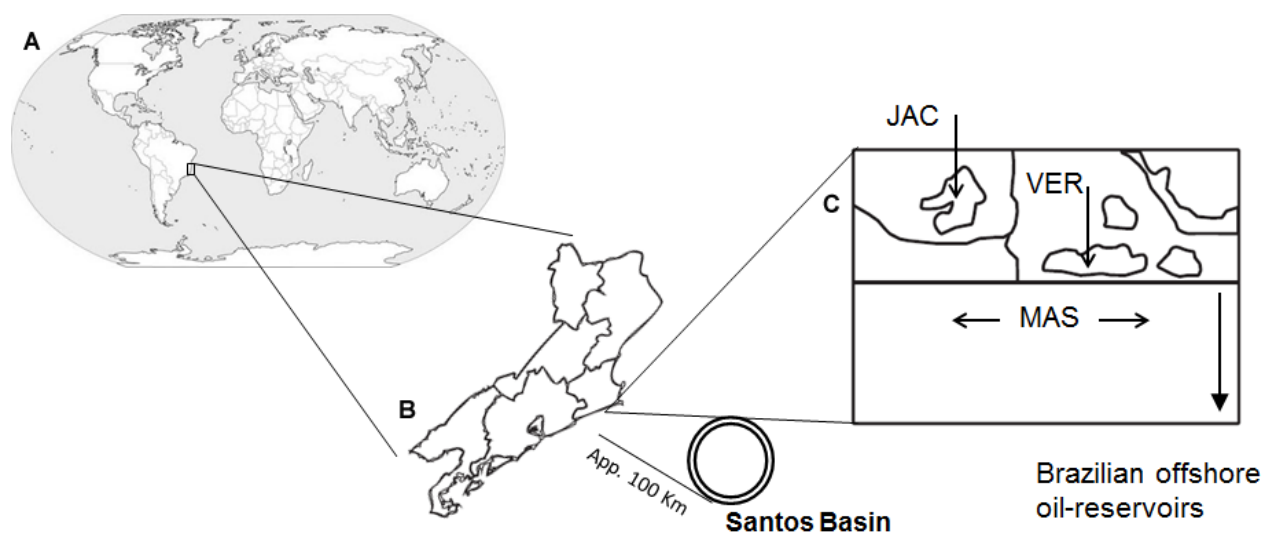

**Fig. S1.** (A) World map showing the localization of Rio de Janeiro (Brazil). (B) The Rio de Janeiro and primary Brazilian offshore oil-reservoir field (Santos Basin). (C) The Massambaba Environmental Protection Area and the sites sampled are indicated with arrows. JAC, VER and MAS represent Jacarepiá lagoon, Vermelha lagoon and Massambaba beach, respectively.

A

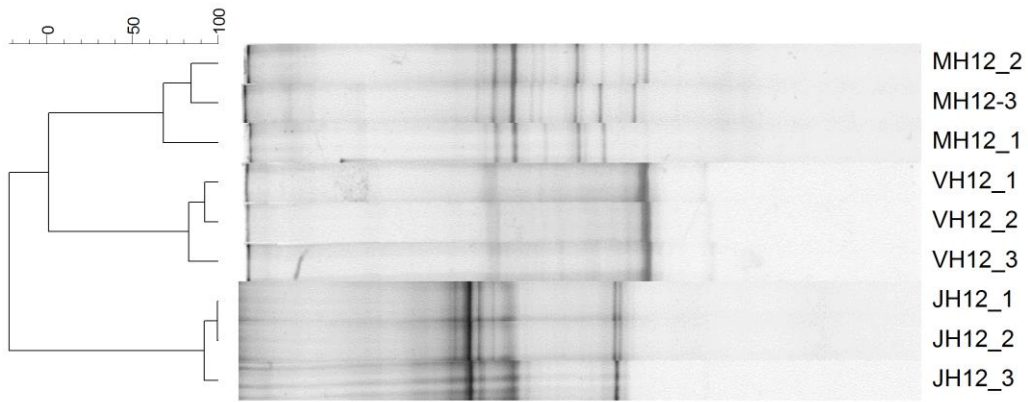

B

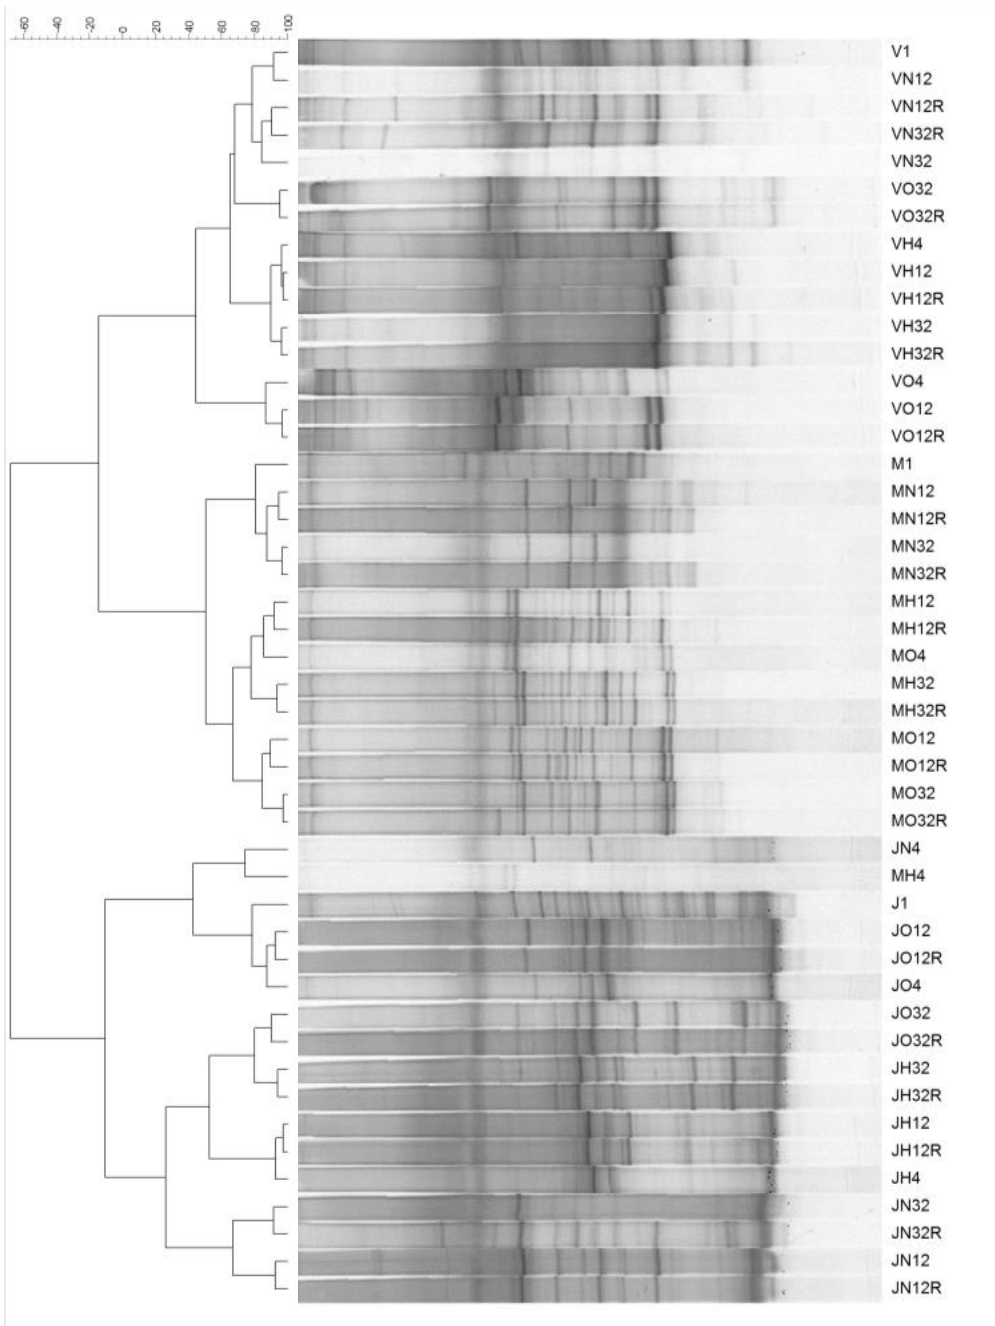

**Fig. S2.** Denaturing gradient gel electrophoresis (DGGE) fingerprints and the dendrogram obtained after the cluster analysis using the Ward and similarity Pearson coefficients to compare the structures of the hydrocarbon-enriched bacterial communities from the contaminated microcosms. (A) DGGE of heptadecane-enriched bacterial communities (at 12 days after the microcosms were established) showing the sampling replicates of the different microcosms. (B) DGGE of temporal analyses of contaminated microcosms. The samples are denoted as follows: the first letter corresponds to the origin of the samples (J – Jacarepiá lagoon, M – Massambaba beach and V – Vermelha lagoon), followed by the hydrocarbon used in the different microcosms (H – heptadecane, N – naphthalene and O – crude oil), and the number representing the sampling point (0, 4, 12 and 32 days). The last letter represents either DNA (D)- or RNA (R)-based analyses.

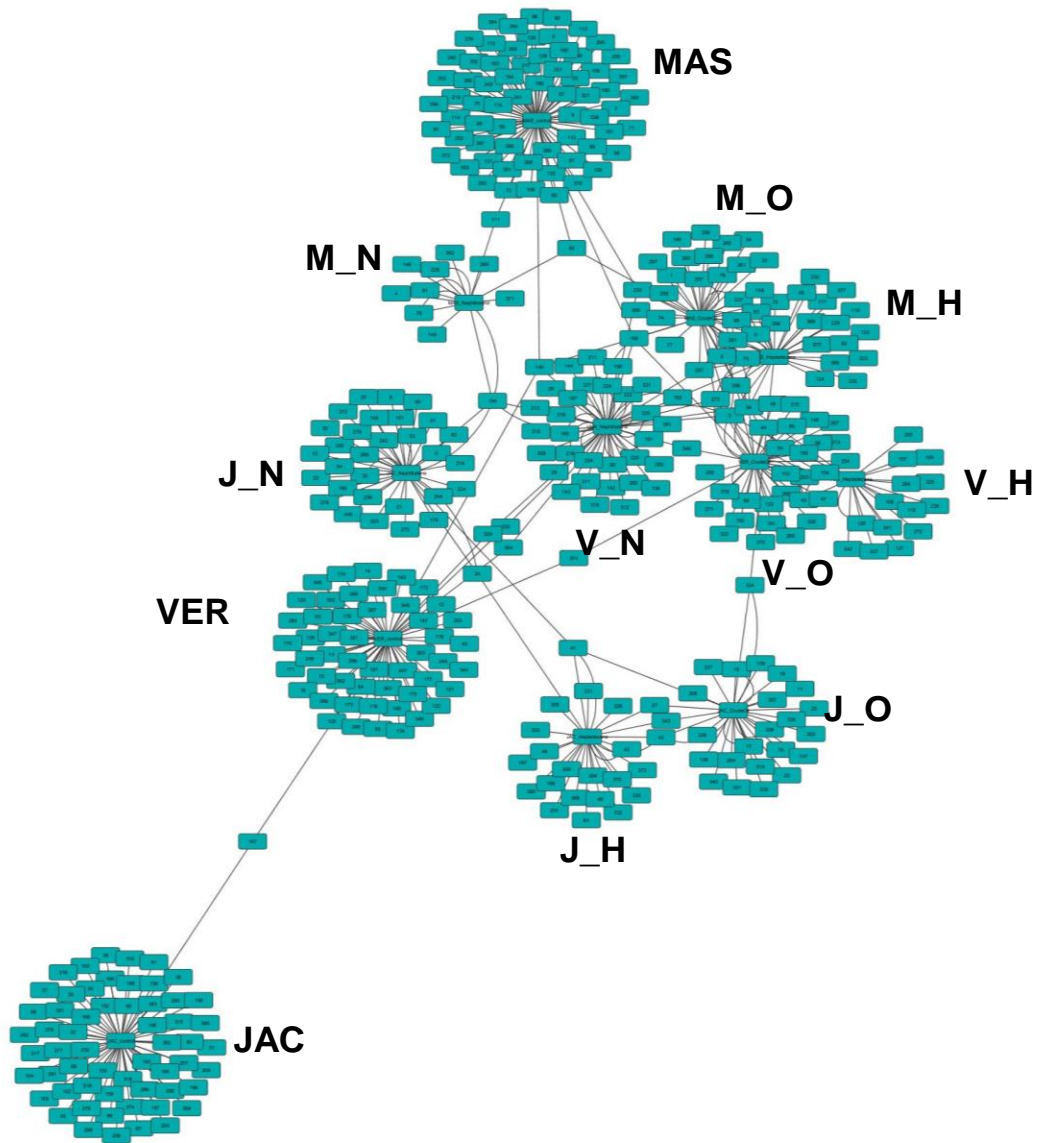

**Fig. S3.** Network Analysis constructed using the Cytoscape program showing the unique and shared bacterial OTUs among the different samples. The samples are denoted as follows: the first letter represents the origin of the samples (J – Jacarepiá lagoon, M – Massambaba beach and V – Vermelha lagoon), followed by the hydrocarbon used in the different microcosms (H – Heptadecane, N – Naphthalene and O – crude oil). JAC, MAS and VER represent the controls (without contamination) for Jacarepiá lagoon, Massambaba beach and Vermelha lagoon, respectively.



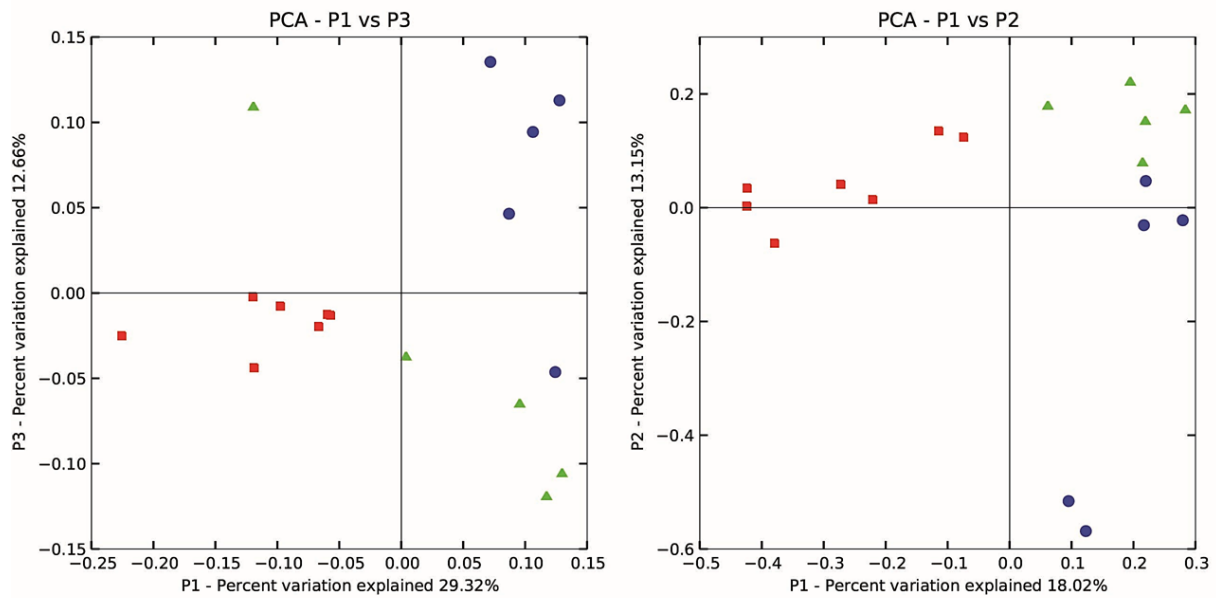

**Fig. S4.** The unweighted and weighted UniFrac Principal Coordinate Analysis (PCoA) ordination diagram was generated based on data obtained from clone libraries (OTU = 97%). The data were plotted based on the ecosystem type, and the colors chosen for the different sample groups are the same as those used in the Redundancy Analysis (RDA, Fig. 2): green, Vermelha lagoon; blue, Massambaba beach and red, Jacarepiá lagoon.
